# Supplementary material for: Plasma renin activity in patients with heart failure and reduced ejection fraction on optimal medical therapy
Source: PubMed Central journal article supplement — J Renin Angiotensin Aldosterone Syst. 2017 Sep 6;18(3):1470320317729919. doi: 10.1177/1470320317729919 (PMC5843922; doi:10.1177/1470320317729919), 2017-09-06
Supplement: jraas-2017-0007.pdf [file jraas-2017-0007.pdf]

## Supplementary appendices

**Table 1 appendix: Characteristics of acute decompensated HFREF patients according to PRA tertiles**

|                                           | Lowest PRA tertile<br>0.2-0.9 ng/ml/h | Median PRA tertile<br>1.0-3.3 ng/ml/h | Highest PRA tertile<br>>3.3 ng/ml/h | p            |
|-------------------------------------------|---------------------------------------|---------------------------------------|-------------------------------------|--------------|
| <b>Baseline characteristics</b>           |                                       |                                       |                                     |              |
| - Age                                     | 68±14                                 | 65±13                                 | 69±12                               | 0.70         |
| - Male (%)                                | 73                                    | 68                                    | 83                                  | 0.52         |
| - Ischemic etiology (%)                   | 64                                    | 45                                    | 57                                  | 0.81         |
| - LVEF (%)                                | 24±10                                 | 23±10                                 | 27±9                                | 0.38         |
| - Maximal aerobic capacity<br>(ml/kg/min) | 13±4                                  | 13±4                                  | 12±3                                | 0.57         |
| <b>Baseline parameters</b>                |                                       |                                       |                                     |              |
| - HR (bpm)                                | 78±20                                 | 88±19                                 | 79±16                               | 0.18         |
| - Systolic Blood pressure<br>(mmHg)       | 132±20                                | 136±19                                | 114±23                              | <b>0.001</b> |
| - Diastolic blood pressure<br>(mmHg)      | 73±11                                 | 77±19                                 | 66±13                               | <b>0.04</b>  |
| <b>Baseline Medical therapy</b>           |                                       |                                       |                                     |              |
| - ACE/ARB use (%)                         | 50                                    | 45                                    | 59                                  | 0.24         |
| ○ ≤50% of target dose                     | 20                                    | 31                                    | 50                                  |              |
| ○ >50% of target dose                     | 30                                    | 14                                    | 9                                   |              |
| - BB use (%)                              | 73                                    | 50                                    | 87                                  | 0.23         |
| ○ ≤50% of target dose                     | 55                                    | 36                                    | 61                                  |              |
| ○ >50% of target dose                     | 18                                    | 14                                    | 26                                  |              |

|                          |                  |                   |                |                  |
|--------------------------|------------------|-------------------|----------------|------------------|
| - MRA use (%)            | 41               | 32                | 70             | <b>0.03</b>      |
| - Loop diuretic use (%)  | 64               | 55                | 74             | 0.40             |
| <b>Laboratory values</b> |                  |                   |                |                  |
| - Creatinine (mg/dl)     | 1.4±0.9          | 1.3±0.5           | 1.6±0.6        | 0.43             |
| - NT-proBNP (ng/l)       | 4317 [2649;7559] | 2979 [1699;11498] | 3189           | 0.89             |
| - PRA (ng/ml/h)          | 0.6 [0.3;0.8]    | 1.5 [1.2;2.5]     | [1428;13428]   | <b>&lt;0.001</b> |
| - Aldosterone (ng/ml)    | 154 [103;185,5]  | 173 [130;261]     | 9.5 [5.7;12;1] | <b>&lt;0.001</b> |
|                          |                  |                   | 398 [180;765]  |                  |

ACE-i, angiotensin-converting enzyme inhibitor; ARB, angiotensin receptor blocker; HR, heart rate; LVEF, left ventricular ejection fraction; MRA, mineralocorticoid receptor antagonist; NT-proBNP, N-terminal of the prohormone of B-type natriuretic peptide; PRA, plasma renin activity

**Table 2 Appendix: Characteristics of chronic ambulatory HFREF patients according to PRA tertiles**

|                                           | <b>Lowest PRA tertile<br/>0.2-3.3 ng/ml/h</b> | <b>Median PRA tertile<br/>3.5-15 ng/ml/h</b> | <b>Highest PRA tertile<br/>&gt;15.0 ng/ml/h</b> | <b>p-value</b> |
|-------------------------------------------|-----------------------------------------------|----------------------------------------------|-------------------------------------------------|----------------|
| <b>Baseline characteristics</b>           |                                               |                                              |                                                 |                |
| - Age                                     | 70±12                                         | 65±12                                        | 63±11                                           | 0.11           |
| - Male (%)                                | 70                                            | 64                                           | 85                                              | 0.18           |
| - Ischemic HF etiology (%)                | 73                                            | 52                                           | 58                                              | 0.28           |
| - LVEF (%)                                | 33±8                                          | 33±8                                         | 31±5                                            | 0.65           |
| - Maximal aerobic capacity<br>(ml/kg/min) | 14±3                                          | 15±4                                         | 16±6                                            | 0.43           |
| <b>Baseline parameters</b>                |                                               |                                              |                                                 |                |
| - HR (bpm)                                | 65±9                                          | 67±11                                        | 67±9                                            | 0.70           |
| - Systolic Blood pressure<br>(mmhg)       | 132±18                                        | 120±16                                       | 119±15                                          | <b>0.01</b>    |
| - Diastolic blood pressure<br>(mmhg)      | 67±11                                         | 62±11                                        | 60±13                                           | 0.08           |
| <b>Medical therapy</b>                    |                                               |                                              |                                                 |                |
| - ACE/ARB use (%)                         | 86                                            | 100                                          | 96                                              | 0.41           |
| ○ ≤50% of target dose                     | 54                                            | 64                                           | 44                                              |                |
| ○ >50% of target dose                     | 32                                            | 36                                           | 52                                              |                |
| - BB use (%)                              | 96                                            | 96                                           | 100                                             | 0.38           |
| ○ ≤50% of target dose                     | 32                                            | 44                                           | 64                                              |                |

|                          |               |               |                 |                  |
|--------------------------|---------------|---------------|-----------------|------------------|
| ○ >50% of target dose    | 64            | 52            | 36              |                  |
| - MRA use (%)            | 83            | 87            | 95              | 0.99             |
| - Loop diuretic use (%)  | 46            | 40            | 62              | 0.28             |
| <b>Laboratory values</b> |               |               |                 |                  |
| - Creatinine (mg/dl)     | 1.3±0.6       | 1.2±0.5       | 1.3±0.4         | 0.80             |
| - Pro BNP (ng/l)         | 942[376;2595] | 531[122;1104] | 608[204;1504]   | 0.13             |
| - PRA (ng/ml/h)          | 0.9[0.7;2.3]  | 7.6[5.1;11.4] | 24.9[17.6;37.1] | <b>&lt;0.001</b> |
| - Aldosterone (ng/ml)    | 189[126;259]  | 231[153;341]  | 348[157;507]    | <b>0.03</b>      |

ACE-i, angiotensin-converting enzyme inhibitor; ARB, angiotensin receptor blocker; HR, heart rate; LVEF, left ventricular ejection fraction; MRA, mineralocorticoid receptor antagonist; NT-proBNP, N-terminal of the prohormone of B-type natriuretic peptide; PRA, plasma renin activity

**Table 3 Appendix: Characteristics of acute HFREF patients according to PRA increase or decrease on day 3 of decongestive therapy compared to baseline PRA level.**

|                                        | <b>PRA increase during decongestive therapy<br/>n=42</b> | <b>PRA decrease During decongestive therapy<br/>n=17</b> | <b>p</b>    |
|----------------------------------------|----------------------------------------------------------|----------------------------------------------------------|-------------|
| <b>Baseline characteristics</b>        |                                                          |                                                          |             |
| - Age                                  | 68±13                                                    | 65±13                                                    | 0.38        |
| - Male (%)                             | 67                                                       | 88                                                       | 0.09        |
| - Ischemic etiology (%)                | 62                                                       | 41                                                       | 0.31        |
| - LVEF (%)                             | 24±4                                                     | 21±7                                                     | 0.65        |
| - Maximal aerobic capacity (ml/kg/min) | 12±4                                                     | 14±4                                                     | 0.24        |
| <b>Baseline parameters</b>             |                                                          |                                                          |             |
| - HR (bpm)                             | 82±19                                                    | 87±21                                                    | 0.17        |
| - Systolic Blood pressure (mmHg)       | 129±23                                                   | 121±21                                                   | <b>0.04</b> |
| - Diastolic blood pressure (mmHg)      | 70±15                                                    | 80±15                                                    | 0.35        |
| <b>Baseline Medical therapy</b>        |                                                          |                                                          |             |
| - ACE/ARB use (%)                      | 43                                                       | 53                                                       | 0.48        |
| ○ ≤50% of target dose                  | 29                                                       | 47                                                       |             |
| ○ >50% of target dose                  | 14                                                       | 6                                                        |             |
| - BB use (%)                           | 71                                                       | 65                                                       | 0.59        |
| ○ ≤50% of target dose                  | 62                                                       | 41                                                       |             |
| ○ >50% of target dose                  | 9                                                        | 24                                                       |             |

|                                                                                                  |                  |                  |             |
|--------------------------------------------------------------------------------------------------|------------------|------------------|-------------|
| - MRA use (%)                                                                                    | 45               | 47               | 0.79        |
| - Loop diuretic use baseline (%)                                                                 | 60               | 65               | 0.56        |
| - Cumulative loop diuretic dose during 3 days of decongestive therapy (mg bumetanide equivalent) | 4.0±2.8          | 4.2±3.1          | 0.97        |
| <b>Laboratory values</b>                                                                         |                  |                  |             |
| - Creatinine (mg/dl)                                                                             | 1.4±0.6          | 1.3±0.6          | 0.87        |
| - NT-proBNP (ng/l)                                                                               | 4997[2433;10659] | 2979[1570;10729] | 0.53        |
| - PRA (ng/ml/h)                                                                                  | 1.3[0.7;4.5]     | 3.0[1.2;8.7]     | <b>0.02</b> |
| - Aldosterone (ng/ml)                                                                            | 172[132;293]     | 236[169;566]     | 0.26        |

ACE-i, angiotensin-converting enzyme inhibitor; ARB, angiotensin receptor blocker; HR, heart rate; LVEF, left ventricular ejection fraction; MRA, mineralocorticoid receptor antagonist; NT-proBNP, N-terminal of the prohormone of B-type natriuretic peptide; PRA, plasma renin activity
